1 **Orientations of Mistaken Point fronds indicate morphology impacted**  
2 **ability to survive turbulence**

3 *Vixseboxse*\*<sup>1</sup>, Philip B., Kenchington<sup>2</sup>, Charlotte G., Dunn<sup>3</sup>, Frances S. and Mitchell\*<sup>4</sup>,  
4 Emily G.

5 <sup>1</sup>*School of Earth Sciences, University of Bristol, Wills Memorial Building, Queens Road,*  
6 *Bristol BS8 1RJ, UK.*

7 <sup>2</sup>*Department of Earth Sciences, University of Cambridge, Downing Street, Cambridge, CB2*  
8 *3EQ, UK.*

9 <sup>3</sup>*Oxford University Museum of Natural History, Parks Road, Oxford, OX1 3PW, Oxford, UK.*

10 <sup>4</sup>*Department of Zoology, University of Cambridge, Downing Street, Cambridge, CB2 3EJ,*  
11 *UK.*

12 \*Corresponding author: pv17454@bristol.ac.uk

13 **ABSTRACT**

14 The Ediacaran organisms of the Mistaken Point E surface have provided crucial insight into  
15 early animal communities, including how they reproduced, the importance of Ediacaran  
16 height and what the most important factors were to their community dynamics. Here, we use  
17 this iconic community to investigate how morphological variation between eight taxa  
18 affected their ability to withstand different flow conditions. For each of *Beothukis*,  
19 *Bradgatia*, *Charniodiscus procerus*, *Charniodiscus spinosus*, *Plumeropriscum*,  
20 *Primocandelabrum* and *Fractofusus* we measured the orientation and length of their stems (if  
21 present) and their fronds. We statistically tested each taxon's stem and frond orientation  
22 distributions to see whether they displayed a uniform or multimodal distribution. Where  
23 multimodal distributions were identified, the stem/frond length of each cohort was tested to

24 identify if there were differences in size between different orientation groups. We find that  
25 *Bradgatia* and *Thectardis* show a bimodal felling direction, and infer that they were felled by  
26 the turbulent head of the felling flow. In contrast, the frondose rangeomorphs including  
27 *Beothukis*, *Plumeropriscum*, *Primocandelabrum*, and the arboreomorphs were felled in a  
28 single direction, indicating that they were upright in the water column, and were likely felled  
29 by the laminar tail of the felling flow. These differences in directionality suggests that an  
30 elongate habit, and particularly possession of a stem, lent greater resilience to frondose taxa  
31 against turbulent flows, suggesting that such taxa would have had improved survivability in  
32 conditions with higher background turbulence than taxa like *Bradgatia* and *Thectardis*, which  
33 lacked a stem and which had a higher centre of mass, which may have fared better in quieter  
34 water conditions.

35 **KEYWORDS:** Ediacaran, Mistaken Point, Orientations, Turbidite, Rangeomorphs,  
36 Arboreomorphs

37

## 38 INTRODUCTION

39 The Ediacaran macrobiota is a probably polyphyletic assemblage of organisms which appear  
40 in the fossil record ~575 million years ago and contain some of the oldest animals in the  
41 fossil record (Xiao and Laflamme 2009; Budd and Jensen 2017; Bobrovskiy et al. 2018;  
42 Cuthill and Han 2018; Dunn et al. 2018, 2021; Wood et al. 2019). The morphologies of  
43 Ediacaran organisms from Newfoundland and the UK have few clear points of homology  
44 with living animal lineages or Phanerozoic fossil groups, which has historically limited our  
45 understanding of their phylogenetic affinities and hampers our understanding of the  
46 functional ecology of these organisms (Liu et al. 2015).

47 The Ediacaran communities of Eastern Newfoundland are dominated by the perhaps most  
48 distinct members of the Ediacaran macrobiota - the sessile, frondose rangeomorphs  
49 (Narbonne and Gehling 2003; Narbonne 2005). Rangeomorphs are characterised by a  
50 “fractal” branching architecture (Narbonne 2004; Cuthill and Morris 2014), and which  
51 increasing data supports as a clade of stem-group eumetazoans (Cuthill and Han 2018; Dunn  
52 et al. 2021). Rangeomorphs numerically dominate these late-Ediacaran sea floors, but they  
53 lived alongside a number of different groups the most abundant of which are the  
54 arboreomorphs (Clapham et al. 2003; Xiao and Laflamme 2009). These are similarly  
55 frondose, but unlike the rangeomorphs which can possess many orders of hierarchical  
56 branching, Newfoundland arboreomorphs possess only two (Laflamme et al. 2004; Laflamme  
57 and Narbonne 2008; Laflamme et al. 2018). Non-frondose fossils are also present, though  
58 rare, in these fossil deposits and the most well-known is *Thectardis* a conical to triangular  
59 organism sometimes interpreted as a sponge (Clapham et al. 2004; Sperling et al. 2011).  
60 Of these groups, rangeomorphs are not only the most diverse but display the greatest  
61 anatomical variation (Shen et al. 2008; Xiao and Laflamme 2009). Some rangeomorphs are

62 preserved as single fronds (e.g. *Charnia*), but others were bushy (e.g. *Bradgatia*), spindle-  
63 shaped (e.g. *Fractofusus*) or arborescent (e.g. *Primocandelabrum*) (Gehling and Narbonne  
64 2007; Bamforth et al. 2008; Flude and Narbonne 2008; Bamforth and Narbonne 2009; Dunn  
65 et al. 2019). Rangeomorph branches differentiated directly from one another or from a central  
66 stalk (Dunn et al. 2019) and some rangeomorphs additionally exhibited a naked stem which  
67 elevated the frond into the water column upright taxa (Laflamme et al. 2012) increasing the  
68 dispersal range of offspring (Mitchell and Kenchington 2018). Most rangeomorphs possessed  
69 a spheroidal-discoidal holdfast which anchored them within the sediment (Laflamme et al.  
70 2004), attaching the organism to the substrate and from which the stem or frond derived.  
71 Previous functional studies have demonstrated that the high surface area of the repeatedly  
72 branched frond maximised nutrient or gas exchange (Laflamme et al. 2009; Sperling et al.  
73 2011; Liu et al. 2015). The phylogenetic relationship between frondose rangeomorphs and the  
74 coeval arboreomorphs is currently unclear (Dececchi et al. 2017; Cuthill and Han 2018);  
75 some have argued that arboreomorphs are members of the Rangeomorpha (Brasier and  
76 Antcliffe 2009), but clear anatomical differences between at least some arboreomorphs and  
77 rangeomorphs mean that this view is not universally held, with others suggesting that overtly  
78 similar gross morphologies may have arisen through convergence (Laflamme et al. 2018).  
79 Indeed, in the modern a sessile, frondose bodyplan is found in myriad different groups, such  
80 as ferns, corals and cnidarians, and has been acquired through different developmental  
81 processes, demonstrating that such a bodyplan can be the produce of similar ecologies or  
82 function and is not necessarily indicative of close phylogenetic relationship.

83 Stems were originally thought to facilitate height-driven tiering in Avalonian communities,  
84 allowing taller fronds to reach higher-velocity conditions (Ghisalberti et al. 2014), but more  
85 recent work has suggested that not all communities were tiered and that increased height may  
86 have additionally functioned in offspring dispersal (Mitchell and Kenchington 2018).

87 Thickening of the stem close to the holdfast – optimisation of the stem as a cantilever beam –  
88 is observed in cnidarians (Koehl 1977*a, b*), and crinoids (Baumiller and Ausich 1996), where  
89 it permits orientation of the crown with the aboral surface facing the flow, initiating aboral  
90 inflow and recirculation (Dynowski et al. 2016). Rangeomorphs have been documented as  
91 showing a basal thickening of the stem and so may have functioned in the same way  
92 (Kenchington and Wilby 2017). By examining the different functional ecology of stemmed  
93 and non-stemmed organisms, we can investigate what the advantages of stems were in  
94 Ediacaran organisms.

95 These fossils are found preserved within turbiditic sequences, under thin layers of ash which  
96 blanketed large swathes of sea floor and smothered thousands of macro-organisms in a single  
97 event bed (Wood et al. 2003). Communities are exceptionally preserved and provide a near-  
98 census record of the benthic communities (Wood et al. 2003). This in-situ preservation,  
99 combined with the sessile habit of the organisms, means that detailed spatial ecological  
100 analyses can be used to investigate reproductive strategies (Mitchell et al. 2015), taxonomy  
101 (Mitchell et al. 2018), community interactions (Mitchell and Butterfield 2018) and  
102 evolutionary drivers (Mitchell et al. 2019, 2020), and in this study supplement functional  
103 ecology analyses of the organisms.

104 Here, we use statistical analyses of the orientations of 8 taxa from the E surface, Mistaken  
105 Point, Newfoundland: *Beothukis*, *Bradgatia*, *Charniodiscus procerus*, *Charniodiscus*  
106 *spinosus*, *Plumeropriscum*, *Primocandelabrum*, *Thectardis*, and *Fractofusus*. We determine  
107 the extent to which orientation distributions of populations of complete specimens, stems and  
108 fronds are randomly, normally and/or uniformly distributed, and how many sub-groups  
109 within each population exist. Where taxa exhibit multi-modal orientation distributions, we  
110 use random labelling spatial analyses to determine whether there are any spatial patterns to  
111 taxa orientations. These analyses enable us to investigate how morphological features, such

112 as stems and number of folia influenced the stability of these organisms in the ancient oceans  
113 and their ability to withstand burial events of differing magnitudes.

## 114 **GEOLOGICAL SETTING**

115 The Avalon Assemblage records the evolution of deep marine metazoan communities from  
116 the ~574 Ma Drook Formation (Matthews et al. 2021), to the late Ediacaran Bradgate  
117 Formation (556.6±6.4 Ma, (Noble et al. 2015)). One of the three assemblages originally  
118 proposed by Waggoner 2003, it traces the marine margin of the Avalonian Terrane through  
119 the British Isles and Newfoundland. In both regions, sedimentation was dominated by  
120 turbidite deposition (Wood et al. 2003; Noble et al. 2015). Throughout the Newfoundland  
121 succession, there is a transition in tectonic setting and depositional character, from the basin  
122 plain setting of the lower Conception Group to the shallowing-upwards slope setting of the  
123 upper Conception and St John's groups, with a concomitant increase in depositional energy  
124 and rate of deposition and a basinwards progradation of the locus of sedimentation (Wood et  
125 al. 2003; Matthews et al. 2021).

126 The Mistaken Point Formation is dominated by thick-bedded, mud-rich and ashy turbidites,  
127 punctuated by tuffaceous horizons (Wood et al. 2003; Ichaso et al. 2007; Matthews et al.  
128 2021). The bed over the E surface has a thin, coarse crystal tuff, a lower graded portion and  
129 an upper portion that consists of alternating dark-light bands (above the chlorite-carbonate  
130 band; (Fig S4; Matthews et al. 2021). The exact mode of emplacement of the tuffaceous  
131 horizons was long thought to be primarily from water-lain ashfall events (where ashy  
132 material enters the basin, and gradually settles out through the water column). However,  
133 recent work suggests that at least some of these horizons were instead the product of ashy  
134 turbidites, and that they contain variable proportions of volcanoclastic (eruptive and/or

135 unlithified reworked) and epiclastic (lithified and reworked) material (Noble et al. 2015;  
136 Kenchington et al. 2018; Matthews et al. 2021).

137 The mode of emplacement has direct implications for understanding the process that felled  
138 the fronds within the palaeocommunities, and therefore their preserved orientations. If the  
139 tuffs were water-lain, they are not necessarily associated with a gravity-driven flow, and  
140 accordingly the fronds were interpreted as having been felled by basin contour-parallel  
141 currents (Wood et al. 2003). However, if the smothering ashes are a product of turbidity  
142 flows, then it is likely that the fronds were felled by these same flows (Matthews et al. 2021).  
143 In the specific case of the E surface, however, there is no contention that there is a gravity-  
144 driven flow origin for the alignment of fronds on the E Surface (F12 of Wood et al. 2003;  
145 Matthews et al. 2021).

#### 146 **Gravity flows and their expression in the rock record**

147 Turbidites are the lithological record of deposition via sediment-laden turbidity currents, and  
148 exist on a continuum with other gravity-driven flows and their deposits (Haughton et al.  
149 2009; Talling et al. 2012). The lack of evidence of fluvial input, together with the slump  
150 horizons that occur throughout the Mistaken Point Formation (Wood et al. 2003), suggests  
151 that the source of the flows in the Mistaken Point Formation are more likely to be those  
152 dominantly sourced from slope failure (slumping), rather than rivers. Therefore, here we  
153 focus only on the former. Gravity flow behaviour, and thus classification, is principally  
154 driven by two factors: the fraction of cohesive components within the sediment, and the  
155 overall concentration of sediments within the flow (e.g. Haughton et al. 2009). Higher  
156 sediment concentrations, and higher fractions of cohesive components (clay minerals and  
157 reworked muds), act to dampen turbulence at the sediment-water interfaces (Cantero et al.

158 2012; Talling et al. 2012), and within dilute turbidity currents (Baas and Best 2002; Baas et  
159 al. 2009).

160 The coarse tuff immediately above the E surface could be indicative of particle sorting and  
161 winnowing within the more turbulent head of the turbidity current (Sparks and Wilson 1983),  
162 while the structure within the rest of the bed is consistent with the hybrid flow model of  
163 Haughton et al. 2009 (Matthews et al. 2021). On a broad scale, this mixed/hybrid flow  
164 interpretation may be reflected in the increased turbidite thickness within the Mistaken Point  
165 Formation (previously interpreted as turbidite ponding, (Ichaso et al. 2007)). Surface  
166 weathering, symsedimentary and early diagenetic alteration of the volcanoclastic source for the  
167 Mistaken Point turbidites would have produced a clay-rich source sediment (cf. Kiipli et al.  
168 2007), enhanced by addition of deposition from nepheloid plumes or as hemipelagic fallout  
169 (cf. Kenchington et al. 2018). This high clay content and high sediment load would have  
170 increased the cohesion within the flow and so dampened its turbulence, potentially generating  
171 conditions conducive to internal laminar flow, while dilution of the turbidite head likely  
172 brought concentrations below the threshold for a laminar-dominated regime (similar to the  
173 high-density turbidity or lower density mixed flows of Haughton et al., 2009), with turbulent  
174 conditions within the turbidite head.

175 As a flow moves down a slope, it can change character and concentration, reflected in  
176 different depositional products (Houghton et al. 2009). For example, after slumping,  
177 entrainment of water rapidly dilutes the head of the turbidite, inhibiting sediment-induced  
178 turbulence dampening (Hallworth et al. 1993; Cartigny et al. 2013). In contrast, entrainment  
179 of clay-rich material would have the opposite effect. Differential dilution-driven turbulence  
180 often manifests as Kelvin-Helmholtz instabilities (Liu and Jiang 2014), wherein turbulent  
181 eddies rotate about a horizontal axis orthogonal to the direction of turbidite propagation (see



182 “roll waves” of Cartigny et al. 2013) – important when we are thinking about the processes  
183 controlling frond orientation.

## 184 **MATERIALS AND METHODS**

### 185 *Data processing*

186 In this study we used mapped data from the E surface given by Mitchell et al. 2019,  
187 supplemented with *Fractofusus* data from Clapham et al. 2003. Mitchell et al. LiDAR  
188 scanned the E surface using a Faro Focus 330X to ensure spatial accuracy was maintained  
189 over large areas. The LiDAR scans resulted in a 3D surface mesh of 1 mm resolution. In  
190 order to get sufficient resolution to resolve taxonomic identity, Mitchell et al also laser  
191 scanned the E surface using a Faro Scan Arm v6LLP, resulting in surface meshes of ~0.050  
192 mm resolution. The high-resolution scanning was done in grids of ~1m x 1m. Due to large  
193 file sizes, these high-resolution scans could not all be viewed simultaneously, so control  
194 points were marked in each high-resolution scan, and in the LiDAR scan, enabling accurate  
195 combination of the high-resolution scans with the LiDAR surface data (performed using  
196 Geomagic 2015). A photomap was created by photographing the specimens along a  
197 horizontal and vertical grid, then using Agisoft Photoscan software v1.3.5 to create a  
198 photogrammetric render of the surface. The LiDAR scan was then imported into Photoscan,  
199 and the photographs aligned on the LiDAR scan to ensure large-scale accuracy. An  
200 orthomosaic of the surface was produced within Agisoft PhotoScan, from which the data was  
201 collected. The combination of LiDAR, LLP and photogrammetry enabled accurate retention  
202 of angle data between photographs, with minimal perspective projection distortion (Mitchell  
203 et al. 2019). Specimens were binned into 7 morphogroups: *Beothukis* – a unifoliate, spatulate-  
204 fronded rangeomorph, with a short – or absent – stem and holdfast (Brasier and Antcliff  
205 2009; Hawco et al. 2020); *Bradgatia* – a multifoliate rangeomorph consisting of up to eight

206 primary branches from a central branching point on an inferred holdfast (Boynton and Ford  
207 1995; Flude and Narbonne 2008); *Charniodiscus procerus* – a unifoliate arboreomorph  
208 possessing a circular holdfast, elongate stem, and a lanceolate frond (often laterally  
209 displaced) without fractal, rangeomorph-style branching (Laflamme et al. 2004);  
210 *Charniodiscus spinosus* – a unifoliate arboreomorph with a large ovate frond, lacking  
211 rangeomorph-style branching, tipped with an elongate spine, connected to a large holdfast via  
212 a short cylindrical stem (Laflamme et al. 2004); *Plumeropriscum* – a multifoliate  
213 rangeomorph composed of at least nine primary branches furcating from an elongate  
214 cylindrical stem, attached to the substrate by a discoidal holdfast (Mason and Narbonne  
215 2016); *Primocandelabrum* – a multifoliate rangeomorph consisting of a large holdfast,  
216 elongate stem, and substantial crown composed of three first order branches (Hofmann et al.  
217 2008; Kenchington and Wilby 2017) and *Thectardis* – an erect conical taxon lacking  
218 evidence of a holdfast (Clapham et al. 2004). We used the size and orientation data from  
219 Clapham et al. 2003 for *Fractofusus*, a spindle-shaped rangeomorph (Gehling and Narbonne  
220 2007). We identified 18 *Beothukis*, 52 *Bradgatia*, 61 *C. procerus*, 31 *C. spinosus*, 20  
221 *Plumeropriscum*, 47 *Primocandelabrum* and 27 *Thectardis* across 85.42m<sup>2</sup> of the E surface  
222 bedding plane. We supplemented this data with 1497 *Fractofusus* orientation data from  
223 Clapham et al. 2003.

#### 224 *Retrodeformation*

225 The E surface has undergone tectonic deformation so prior to any analyses, retrodeformation  
226 needs to be performed to re-engineer the organisms back to their in-death dimensions (Wood  
227 et al. 2003). To perform the retrodeformation, we collected the dimensions and orientations  
228 of 24 representative, large, discs across the E Surface (Supp. Fig. 1). Utilising a constant area  
229 retrodeformation method, the principle axis lengths for each disc were extracted. Following  
230 the methodology of Mitchell et al. (2015), a regression was fitted to determine the

231 retrodeformation ratio (1.75, which within the confidence interval ( $1.71 \pm 0.08$ ) of Mitchell et  
232 al. (2015)), which was applied across the entire E surface. To apply this retrodeformation,  
233 the annotated photosquares were aligned and stitched together in Inkscape v0.92.4, and  
234 rotated to align the principal axes of the mean disc with the vertical and horizontal axes of the  
235 document – thus aligning the eigenvectors of retrodeformation with the axes of the document.  
236 From here, constant area retrodeformation can be characterised as a deformation, which can  
237 be achieved with shortening and elongation of the vertical and horizontal axes. The  
238 retrodeformed surface was then rotated to the original orientation. Overall, the photosquares  
239 were shortened by 26.7% along the eigenvector oriented  $78.5^\circ$ , and elongated 36.8% along  
240 the orthogonal eigenvector of  $168.5^\circ$  (Supp. Fig. 1). We note that, whilst retrodeformation  
241 techniques have the potential to introduce error (Liu et al. 2011), the strong correlation of the  
242 regression ( $R^2 = 0.86$ ) (Supp. Fig. 1) suggests that our retrodeformation technique is suitable  
243 for the spatial scale of the mapped E Surface. The orientation measurements are different for  
244 *Fractofusus* because unlike the frondose organisms there is no differentiation between the top  
245 and bottom half of the organism, such as a disc. As such, the angles are limited to a  $180^\circ$   
246 range of  $150^\circ$  to  $330^\circ$  with the angle of e.g.  $200^\circ$  being equivalent to  $20^\circ$ .

#### 247 *Statistical analyses*

248 For each taxon population we performed four tests in R v4.0.4. To test for non-uniform  
249 distributions of orientation data we used the Rao's Spacing Test of Uniformity using the  
250 package CircStats v0.2-6 (Agostinelli and Agostinelli 2018), with a  $p$ -value  $< 0.05$  indicating  
251 a non-uniform distribution (Rao 1976). For our data, a significant  $p$ -value indicates non-  
252 random felling of organisms, with some orientations exhibiting a greater abundance than  
253 would otherwise be expected from random felling. In order to test for multimodal  
254 distributions within angular data we used the Hermans-Rasson test (HR test of Landler et al.  
255 2019) using the package CircMLE v3.0.0 (Fitak and Johnsen 2017). Where multi-modal

256 distributions were found, the mean values for each peak were identified utilising the gaussian  
257 finite mixture model-based clustering algorithms of mclust v5.4.7 (Fraley and Raftery 2017).  
258 To account for the circular nature of angular data, the density distribution was inspected and  
259 split at a minimum to ensure any peaks coincident with  $0^\circ$  were not bisected. This split  
260 produced a continuous  $360^\circ$  density distribution with no assumed peak bisection. When  
261 more than one distribution was present (i.e. bidirectional distributions), the data were  
262 partitioned into two peaks, whilst unimodal distributions (including those found to be  
263 composed of multiple coincident distributions) were left unpartitioned. The circular  
264 equivalent to a normal distribution is the von Mises distribution, tested using a Watson's  
265 goodness of fit (Agostinelli and Agostinelli 2018). A statistically significant *p*-value output  
266 corroborates a von Mises distribution – where a significant von Mises distribution was found,  
267 the models of Schnute and Groot (1992) were employed to test for a variety of modelled  
268 orientation scenarios. For bimodally-distributed taxa, the constituent distributions were  
269 partitioned and frond lengths cross-compared utilising a Mann-Whitney test. Statistical  
270 significance would suggest non-uniform sampling from the same parent population; in  
271 essence, the orientation-partitioned data would exhibit different frond length distributions.  
272 In order to investigate the spatial distribution of populations which exhibited significant  
273 multi-modal orientations, random labelling analyses (RLA) were used. RLA are a type of  
274 spatial point process analysis whereby the position of each point (here fossil specimen) is  
275 kept constant, but the label (here the orientation group) is randomly permuted about the  
276 points (Illian et al. 2008). As such, RLAs do not directly measure the aggregation or  
277 segregation between labels (here orientation patterns), so do not test the processes that  
278 resulted in labels, but instead measure the differences in spatial distributions of the labels  
279 independently of the positions of the fossil specimens (cf. Mitchell et al. 2018). Spatial  
280 distributions are commonly described using pair correlation functions (PCFs) which describe

281 how the density of points (i.e. fossil specimens) changes as a function of distance from the  
282 average specimen (e.g. Illian et al. 2008). RLAs assess the differences between two  
283 characters (orientation group 1 or group 2) of the populations by calculating variations  
284 between PCFs by considering the Difference test and the Quotient test (Wiegand and  
285 Moloney 2013). The Difference test is the calculation of the difference the distribution of  
286 each group in turn ( $PCF_{11}$  is the distribution of group 1 and  $PCF_{22}$  the distribution of group 2)  
287 i.e.  $PCF_{11} - PCF_{22}$ . These differences test the relative aggregation (or segregation) of the  
288 spatial distributions of the orientations compared to each other. If  $PCF_{11} - PCF_{22} = 1$  then the  
289 orientation groups are randomly distributed about the surface. The Quotient test calculates  
290 how the relative group (Diggle et al. 2005) changed with respect to the total density (i.e. the  
291 joined distribution of both group 1 and group 2). The distribution of group 1 relative to the  
292 joined groups  $PCF_{1,1+2}$ , and group 2 relative to the joined groups  $PCF_{2,2+1}$  with the Quotient  
293 test as the calculation:  $PCF_{1,1+2} - PCF_{21}/PCF_{2,2+1}$ . If  $PCF_{12}/PCF_{1,1+2} - PCF_{21}/PCF_{2,2+1} > 0$   
294 then group 2 is mainly located in areas with high density of the joint pattern, and group 1 is in  
295 low density areas (i.e., group 2 has more neighbours than group 1. If this Quotient is  
296 significantly non-zero, then the process underlying the characters is density-dependent. In  
297 order to test whether any observed patterns were significantly different from a random  
298 distribution we follow Mitchell and Harris 2020 and use two different methods, which are  
299 commonly used to establish acceptance or rejection of the null hypotheses for ecological data  
300 (e.g. Illian et al. 2008 and references therein): 1) Monte Carlo simulations, and 2) Diggle's  
301 goodness-of-fit test  $p_d$ , which represents the total squared deviation between the observed  
302 pattern and the simulated pattern across the studied distances (Diggle et al. 2005). For each  
303 RLA test performed, 999 Monte Carlo simulations were used to generate simulation  
304 envelopes around the random PCF difference (e.g.  $PCF_{11} - PCF_{22} = 0$ ) and the  $p_d$  values were  
305 calculated using Diggle's goodness-of-fit test. If the observed test (either Difference or

306 Quotient) fell outside the RLA generated Monte Carlo envelopes and also had  $p_d < 0.1$ , then  
307 the distributions were found to be significantly different. RLAs were performed in  
308 Programita (Wiegand and Moloney 2013).

## 309 RESULTS

310 For all morphogroups, we found statistically significant non-random distributions using the  
311 Rao's Spacing Test of Uniformity and the improved Hermans-Rasson – (all  $p < 0.01$ , Table  
312 1). The majority of taxa exhibited a non-von Mises (i.e. non-normal) distributions as per the  
313 Watson's test (Table 1). One *Bradgatia* cohort ( $p < 0.05$ ), and the *Primocandelabrum* stems  
314 ( $p < 0.01$ ), and fronds ( $p < 0.05$ ) exhibited von-Mises distributions (Table 1). The von-Mises  
315 distributions for *Primocandelabrum* enabled model fitting to the orientation distributions of  
316 *Primocandelabrum*, which were found to exhibit bi-modal distributions (Supp. Fig. 2).

317 Analyses of the number of cohorts within each morphogroup orientation distribution varied  
318 between 1 and 5 (Table 2, Figure 4). For *C. procerus* and *Plumeropriscum*, the stems and  
319 fronds exhibited uni-modal distributions, with similar mean orientations of  $195^\circ$  and  $192^\circ$  for  
320 *C. procerus* stems and fronds and  $178^\circ$  and  $177^\circ$  for *Plumeropriscum* (Table 2, Figure 4).

321 The majority (96.77%) of *C. spinosus* stems and fronds exhibited a unimodal distribution  
322 ( $190^\circ$  and  $183^\circ$  respectively), with a single outlier orientated at  $326^\circ$  for stem and  $328^\circ$  for  
323 frond (Table 2, Figure 4, Supp. Fig. 3). Similarly, *Primocandelabrum* specimens exhibit a  
324 unimodal distribution for their fronds (95.74%,  $187^\circ$ ) and with a minor bimodal component  
325 for the stems (89.36%,  $183^\circ$ ; 6.38%,  $237^\circ$ ), with two singleton outliers, and frond at  $14^\circ$  and  
326 the second with its stem at  $119^\circ$  and frond at  $98^\circ$  (Table 2, Figure 4, Supp. Fig. 3).

327 *Thectardis* and *Bradgatia* exhibited bi-modal distributions, with different distributions  
328 indicated by the mean orientations being notably different between the two groups, in  
329 contrast to *Primocandelabrum* and *C. spinosus* (Table 2, Figure 4). The majority of

330 *Bradgatia* specimens (57.69%) formed a cohort with the mean orientation of 15 °, with the  
331 remainder (42.31%) within the cohort at 188 ° (Table 2, Figure 4). The majority of  
332 *Thectardis* specimens (74.07%) formed a cohort with the mean orientation of 199 °, with the  
333 remainder (25.93%) within the cohort at 17 ° (Table 2, Figure 4). The distribution of sampled  
334 *Beothukis* specimens formed 5 distinct cohorts (Table 2), with one specimen notably different  
335 at 95 ° to the other four cohorts, which had similar mean orientations with the unimodal taxa  
336 orientations. The small number of specimens within the *Beothukis* distributions indicates that  
337 the relatively high number of cohorts could be an artefact of small sample sizes. *Fractofusus*  
338 exhibited a multi-modal distribution, with four cohorts at 172 °, 236 °, 295 ° and 318 ° (Table  
339 2, Figure 4).

340 Inspection of the distributions in Figure 4 shows that while the number of statistically  
341 significant cohorts within each morphogroup varies, the stemmed taxa (*C. spinosus*, *C.*  
342 *procerus*, *Plumeropriscum* and *Primocandelabrum*) and *Beothukis* were all orientated in  
343 similar directions, while *Bradgatia* and *Thectardis* had a significant proportion of specimens  
344 with an antipodal orientation (Table 2, Figure 4). While the mean orientations of the multiple  
345 *Beothukis* cohorts were all tightly clustered, showing clear directionality in a single direction,  
346 the *Fractofusus* mean orientations were evenly distributed across the range, with no such  
347 directionality (Fig. 4).

348 Analyses of the bimodally distributed taxa found no significant differences mean frond length  
349 for *Bradgatia* ( $p = 0.1850$ ), or cone length for *Thectardis* ( $p = 0.4547$ ) between cohorts.  
350 *Bradgatia* was the only taxon that exhibited significant bidirectionality in numbers sufficient  
351 for RLA (Fig. 5a). The Quotient test RLA, which describes the relative density dependence  
352 of different factors within a spatial population found that there was no density dependence  
353 between the two *Bradgatia* orientation groups ( $p_d = 0.8040$ , Fig. 5b). The Difference test  
354 RLA which tests for the difference between the spatial distributions of the two orientation

355 groups were not significantly different ( $p_d = 0.4104$ , Fig 3c.), although the observed  
356 difference was close to the outside the simulation envelope which could indicate a larger  
357 spatial scale pattern not captured within out data.

## 358 **DISCUSSION**

359 The orientation distributions of fossil specimens are well established as a mechanism to  
360 indicate palaeocurrent directions (Toots 1965; Jones and Dennison 1970). The orientation  
361 distribution of a given taxon depends on its mode of life, with erect benthic organisms  
362 exhibiting strong directionality, in contrast to non-erect organisms which have limited  
363 directionality (Toots 1965; Jones and Dennison 1970; Smith 1980; Demko 1995). These  
364 explanations of orientation distributions have been used to understand the mode-of-life of  
365 Ediacaran taxa, with qualitative examination of 578 *Fractofusus* specimens showing even  
366 orientation distribution suggestive of a reclining mode of life (Gehling and Narbonne 2007).  
367 In contrast, Ediacaran fronds such as *Charniodiscus* and *Charnia* have been interpreted as  
368 erect organisms, due to the morphological similarities to extant benthos such as sea pens  
369 (Seilacher 1992; Laflamme and Narbonne 2008; Laflamme et al. 2012) and - crucially - the  
370 orientation of these fronds are noted to have a strongly preferred orientation, suggested to be  
371 aligned to the contour-parallel current which felled them (Wood et al. 2003; Narbonne 2005;  
372 Laflamme et al. 2012). Strongly orientated organisms have been interpreted as erect because  
373 an organism attached to the seafloor at a single point will have the majority of its body pulled  
374 by the current, orientating it with its long axis parallel to this current. In contrast, if an  
375 organism is reclining on the substrate, it will not be subject to such currents, so will not  
376 display strong orientations (Gehling and Narbonne 2007; Mitchell et al. 2015).

377 The relationship between fossil orientation and mode-of-life is pertinent because there has  
378 recently been revived debate surrounding the nature of the life habit of the Ediacaran



379 rangeomorphs (e.g. McIlroy et al. 2021). Where fronds have historically been interpreted as  
380 displaying a mixture of upright and recumbent lifestyles, recent work has posited that  
381 recumbent lifestyles are more likely for some rangeomorph fronds. Orientation analyses  
382 allows us to test between these two different life habits in a statistically valid way. This study  
383 is the first to quantitatively test the orientation distributions of E surface taxa, and the first to  
384 record differences in orientations between the stems and fronds of these taxa. We find  
385 significant differences in felling behaviour between the stemless *Bradgatia* and *Thectardis*,  
386 *Fractofusus*, and all other taxa (*Beothukis*, the arboreomorphs, *Primocandelabrum*, and  
387 *Plumeropriscum*), which show unidirectional felling all oriented towards the south.  
388 *Fractofusus* shows no notable directionality in any direction, whereas orientation  
389 distributions of *Bradgatia* and *Thectardis* both exhibit evidence of bidirectional felling. We  
390 found no height/sized-based correlations with orientation or outliers. Our results confirm the  
391 qualitative results of previous authors (Laflamme et al. 2012, Wood et al. 2003; Narbonne et  
392 al. 2005; Gehling and Narbonne 2007) whereby frondose taxa such as *Beothukis*,  
393 *Charniodiscus* and *Primocandelabrum* were erect in the water-column, anchored to the sea-  
394 floor, while *Fractofusus* lived close to the substrate in a reclined habit. Our results do not  
395 support recent suggestions that the fronds like *Beothukis* reclined on the sediment in life  
396 (McIlroy et al. 2021). The orientation distributions we find for *Bradgatia* and *Thectardis* are  
397 also consistent with an upright mode of life and felling in a (bidirectional) current. All of our  
398 results and interpretations are based on the behaviour of the majority of specimens within a  
399 taxon, and confirm the utility of populations of specimens rather than outliers to infer the  
400 ecology for the entire population of a given taxon (e.g. Benhadi-Marín 2018). Describing  
401 population distributions enables intra-specific variability to be captured, and thus enables  
402 comparison between populations. Indeed, it is not possible to compare the orientations of two  
403 specimens in a statistically rigorous and robust way without accounting for intra-specific

404 variability, i.e. without quantifying the population behaviour. There are, notably, multiple  
405 cohorts within the orientation distributions of *Beothukis*. However, while *C. procerus*, for  
406 example, exhibits different mean orientation directionality to *Beothukis*, the 95% confidence  
407 interval (as given by two sigma) places all bar one specimen of *Beothukis* (the holotype,  
408 oriented at 95 °) the *C. procerus* confidence interval – and indeed, within the 95%  
409 confidence intervals of all other southerly-oriented taxa. Thus, the *Beothukis* and *C. procerus*  
410 populations do not have significantly different orientations. It is possible of course that the  
411 *Beothukis* holotype belongs to a different species than the remainder of the population  
412 assigned by us to that taxon based on branching characters. However, recent work on the  
413 taxonomy of *Beothukis*, which demonstrates that the holotype is well within all other  
414 specimens with comparable morphology, and which were assigned by those authors to that  
415 taxon (Hawco et al. 2020) renders this unlikely. Indeed, an outlier of *Primocandelabrum* –  
416 whose morphology, and the orientations of the rest of the population, are entirely at odds with  
417 a reclined mode of life – is also oriented at 95 °. Our orientation analyses of the *Beothukis*  
418 population demonstrates how the holotype orientation is an outlier and not representative of  
419 the population. Our results thus confirm an erect lifestyle for *Beothukis* (Wood et al. 2003;  
420 Laflamme and Narbonne 2008; Laflamme et al. 2012), contra McIlroy et al. 2020.

421 *Charniodiscus procerus* specimens – the taxon with the proportionally longest stem of any  
422 studied here (Laflamme et al. 2004) – are all oriented south, in a single cohort, with 1 outlier  
423 individual oriented antipodally (Supp. Fig. 3). All bar one specimen of *Beothukis* is oriented  
424 south, although notably with greater variance than the stemmed arboreomorphs (Fig. 4). All  
425 *Plumeropriscum* specimens are oriented south, along with the majority of *Primocandelabrum*  
426 (Fig. 4). Two *Primocandelabrum* specimens are oriented in a different orientation, away from  
427 the main direction (Fig. 4, Supp. Fig. 3). In contrast, *Bradgatia* specimens are divided almost  
428 equally between north and south felling directions (Fig. 4). These data would suggest that

429 there is a correlation between proportional stem length and felling direction, and for the  
430 multifoliate taxa, there seems to be a strong correlation between presence of a stem and  
431 felling direction. *Thectardis* – with its narrow base and wide top – like *Bradgatia*, also shows  
432 a significant portion felled in the northern direction (Fig. 4).

433 Together, our data suggest that those taxa with bases that are proportionally narrow compared  
434 to the widths of their tops (*Thectardis* and *Bradgatia*) show significantly different felling  
435 behaviours to those taxa that are more elongate and equal in shape, and that those taxa with  
436 the longest and thickest stems show the most consistent felling direction. *Beothukis*, for  
437 example, appears to show a sympodial central axis, and has the widest spread of any of the  
438 unifoliate and dominantly south-felled taxa. Equally, although *Primocandelabrum* has a  
439 sturdy stem, it has a proportionally wide top, and two specimens that are felled at a different  
440 angle from the main population. *Charniodiscus spinosus* has a much shorter stem than *C.*  
441 *procerus*, and also has a few specimens that are felled antipodally. The top-heavy  
442 morphology of *Primocandelabrum*, *Bradgatia* and *Thectardis* would presumably induce  
443 greater drag compared to the more stream-lined unifoliate fronds, making them more  
444 susceptible to felling – and also potentially to adhesion to the matground – with the sturdy  
445 stems of *Primocandelabrum* helping to redress this susceptibility in all but a few individual  
446 cases.

447 Random labelling analyses suggest that these differences are not an artifact of different flow  
448 regimes in different areas, indicating that differences in orientations between stemmed and  
449 stemless organisms may reflect genuine differences in the effect of flow on stemmed and  
450 stemless taxa. Fronds and stems behave differently in flow: at a flow velocity of  $0 \text{ ms}^{-1}$ , both  
451 the frond and the stem will be fully upright, with no deflection, but as the flow velocity  
452 increases the tubular cross-section of the stem maximises the second moment of area, thus  
453 reducing the extent of bending under stress, and so this tubular morphology would serve to

454 reduce the probability of failure via buckling (Wegst and Ashby 2007). Perhaps, because of  
455 this morphology the stem impeded felling of stemmed taxa within the enhanced velocities of  
456 the turbulent head of a turbidite, according with studies concerning the mechanical properties  
457 of stems, for example crinoids and aquatic plants (Baumiller and Ausich 1996; Ming-Chao  
458 and Chang-Feng 1996; Luhar and Nepf 2011).

459 These data support a two-phase model of felling (Fig. 6), corresponding to the different flow  
460 regimes within a gravity flow. We infer that during the turbulent head of the flow, most  
461 fronds were buffeted by Kelvin-Helmholtz vortices. However, some easily-felled taxa  
462 (*Bradgatia* and *Thectardis*) were felled by this turbulence, producing a bimodal distribution  
463 of felling orientations (Figs 4, 6). The transition to laminar flow within the body of the  
464 turbidity flow led to the felling of most remaining fronds, in a unimodal distribution (Figs 4,  
465 6). In Charnwood Forest, we know that at least some fronds were capable of surviving small-  
466 scale disturbance events (Wilby et al. 2015). Wilby et al. focussed on the bimodal population  
467 structures of the unifoliate rangeomorph *Charnia*, but documented other, stemmed taxa that  
468 were also preserved with a bimodal population structure (*Primocandelabrum*, *Hylaecullulus*  
469 and *Charniodiscus*). Together with our data, this suggests that stemmed and elongate taxa  
470 showed greater survivability in high velocity flow. Height in the water column has  
471 previously been demonstrated to increase propagule dispersal, and doesn't appear to provide  
472 refuge from resource competition (Mitchell and Kenchington 2018). Our work suggests that  
473 stems may have had an additional function – lending greater resilience to felling in turbulent  
474 and high velocity flow regimes. These insights hint at potential environmental influences on  
475 the morphological composition of Ediacaran communities.

476 **CONCLUSIONS**

477 We provide the first quantitative analyses of the orientation of populations of specimens from  
478 the Mistaken Point E surface. Our data support traditional palaeobiological models for the life  
479 habits of different organisms which lived in this community, with the majority of frondose  
480 organisms living upright in the water column while the spindle-shaped *Fractofusus* lived flat  
481 on the seafloor. Previous authors have suggested that current type and flow rate may impact  
482 community composition, but we demonstrate for the first time how the presence or absence  
483 of anatomical features impact survivability in different flow regimes. Specifically, we find  
484 that the presence of a stem (and potentially its proportional length) lends greater resilience to  
485 turbulent currents. Future work may find that such traits affect the presence and abundance of  
486 different morphologies under different environmental conditions, and potentially even the  
487 structuring of communities as they experience changing flow conditions.

488 **Acknowledgements** – The Parks and Natural Areas Division (PNAD), Department of  
489 Environment and Conservation, Government of Newfoundland and Labrador, provided  
490 permits to conduct research within the Mistaken Point Ecological Reserve (MPER) in 2010,  
491 2016 and 2017. Readers are advised that access to MPER is by scientific research permit  
492 only. This work has been supported by the Natural Environment Research Council  
493 Independent Research Fellowship NE/S014756/1 to EGM and a Natural Environment  
494 Research Council grant NE/V010859/1 to FSD. FSD acknowledges support from the Royal  
495 Commission for the Exhibition of 1851 and Merton College, Oxford. CGK was supported by  
496 Leverhulme Trust (ECF-2018-542) and by the Isaac Newton Trust 18.08(H).

497 **Author contributions** - PBV conceived and designed the project. Analyses were performed  
498 PBV and EGM. PBV, EGM and CGK contributed to data collection from photosquares and  
499 all authors contributed to the writing up of the final manuscript.

500 **Supporting information** - Supplementary data are available at: [\(link\)](#).

501 **Data accessibility statement** - The original data presented here can be accessed through the  
502 Supporting Information.

503 **References**

504 Agostinelli, C., and M. C. Agostinelli. 2018: CircStats Package. *in Topics in Circular*  
505 *Statistics*. p.

506 Baas, J. H., and J. L. Best. 2002: Turbulence Modulation in Clay-Rich Sediment-Laden  
507 Flows and Some Implications for Sediment Deposition. *Journal of Sedimentary*  
508 *Research* 72:336–340.

509 Baas, J. H., J. L. Best, J. Peakall, and M. Wang. 2009: A Phase Diagram for Turbulent,  
510 Transitional, and Laminar Clay Suspension Flows. *Journal of Sedimentary Research*  
511 79:162–183.

512 Bamforth, E. L., and G. M. Narbonne. 2009: New ediacaran rangeomorphs from Mistaken  
513 Point, Newfoundland, Canada. *Journal of Paleontology* 83:897–913.

514 Bamforth, E. L., G. M. Narbonne, and M. M. Anderson. 2008: Growth and ecology of a  
515 multi-branched Ediacaran rangeomorph from the Mistaken Point assemblage,  
516 Newfoundland. *Journal of Paleontology* 82:763–777.

517 Baumiller, T. K., and W. I. Ausich. 1996: Crinoid stalk flexibility: theoretical predictions and  
518 fossil stalk postures. *Lethaia* 29:47–59.

519 Benhadi-Marín, J. 2018: A conceptual framework to deal with outliers in ecology.  
520 *Biodiversity and Conservation* 27:3295–3300.

521 Bobrovskiy, I., J. M. Hope, A. Ivantsov, B. J. Nettersheim, C. Hallmann, and J. J. Brocks.  
522 2018: Ancient steroids establish the Ediacaran fossil Dickinsonia as one of the earliest  
523 animals. *Science* 361:1246–1249.

- 524 Boynton, H., and T. D. Ford. 1995: Ediacaran Fossils from the Precambrian (Charnian  
525 Supergroup) of Charnwood Forest, Leicestershire, England. *Mercian Geologist*  
526 13:165–182.
- 527 Brasier, M. D., and J. B. Antcliffe. 2009: Evolutionary relationships within the Avalonian  
528 Ediacara biota: new insights from laser analysis. *Journal of the Geological Society*  
529 166:363–384.
- 530 Budd, G. E., and S. Jensen. 2017: The origin of the animals and a ‘Savannah’ hypothesis for  
531 early bilaterian evolution. *Biological Reviews* 92:446–473.
- 532 Cantero, M. I., A. Cantelli, C. Pirmez, S. Balachandar, D. Mohrig, T. A. Hickson, T. Yeh, H.  
533 Naruse, and G. Parker. 2012: Emplacement of massive turbidites linked to extinction  
534 of turbulence in turbidity currents. *Nature Geoscience* 5:42–45.
- 535 Cartigny, M. J. B., J. T. Eggenhuisen, E. W. M. Hansen, and G. Postma. 2013:  
536 Concentration-Dependent Flow Stratification In Experimental High-Density Turbidity  
537 Currents and Their Relevance To Turbidite Facies Models. *Journal of Sedimentary*  
538 *Research* 83:1047–1065.
- 539 Clapham, M. E., G. M. Narbonne, and J. G. Gehling. 2003: Paleoecology of the oldest known  
540 animal communities: Ediacaran assemblages at Mistaken Point, Newfoundland.  
541 *Paleobiology* 29:527–544.
- 542 Clapham, M. E., G. M. Narbonne, J. G. Gehling, C. Greentree, and M. M. Anderson. 2004:  
543 *Thectardis avalonensis*: A new Ediacaran fossil from the Mistaken Point biota,  
544 Newfoundland. *Journal of Paleontology* 78:1031–1036.
- 545 Cuthill, J. F. H., and S. C. Morris. 2014: Fractal branching organizations of Ediacaran  
546 rangeomorph fronds reveal a lost Proterozoic body plan. *Proceedings of the National*  
547 *Academy of Sciences* 111:13122–13126.

- 548 Cuthill, J. F. H., and J. Han. 2018: Cambrian petalonamid Stromatoveris phylogenetically  
549 links Ediacaran biota to later animals. *Palaeontology* 61:813–823.
- 550 Dececchi, T. A., G. M. Narbonne, C. Greentree, and M. Laflamme. 2017: Relating Ediacaran  
551 Fronds. *Paleobiology* 43:171–180.
- 552 Demko, T. 1995: Proceedings of the Third Annual Fossils of Arizona Symposium, November  
553 18, 1995. *in* M. S. Museum, ed. American Traveler Press, p.
- 554 Diggle, P., P. Zheng, and P. Durr. 2005: Nonparametric estimation of spatial segregation in a  
555 multivariate point process: bovine tuberculosis in Cornwall, UK. *Journal of the Royal*  
556 *Statistical Society: Series C (Applied Statistics)* 54:645–658.
- 557 Dunn, F. S., A. G. Liu, and P. C. J. Donoghue. 2018: Ediacaran developmental biology.  
558 *Biological Reviews* 93:914–932.
- 559 Dunn, F. S., P. R. Wilby, C. G. Kenchington, D. V. Grazhdankin, P. C. J. Donoghue, and A.  
560 G. Liu. 2019: Anatomy of the Ediacaran rangeomorph *Charnia masoni*. *Papers in*  
561 *Palaeontology* 5:157–176.
- 562 Dunn, F. S., A. G. Liu, D. V. Grazhdankin, P. Vixseboxse, J. Flannery-Sutherland, E. Green,  
563 S. Harris, P. R. Wilby, and P. C. J. Donoghue. 2021: The developmental biology of  
564 *Charnia* and the eumetazoan affinity of the Ediacaran rangeomorphs. *Science*  
565 *Advances* 7:eabe0291.
- 566 Dynowski, J. F., J. H. Nebelsick, A. Klein, and A. Roth-Nebelsick. 2016: Computational  
567 Fluid Dynamics Analysis of the Fossil Crinoid *Encrinus liliiformis* (Echinodermata:  
568 Crinoidea). *PLOS ONE* 11:e0156408.
- 569 Fitak, R. R., and S. Johnsen. 2017: Bringing the analysis of animal orientation data full circle:  
570 model-based approaches with maximum likelihood. *Journal of Experimental Biology*  
571 220:3878–3882.



- 572 Flude, L. I., and G. M. Narbonne. 2008: Taphonomy and ontogeny of a multibranching  
573 Ediacaran fossil: *Bradgatia* from the Avalon Peninsula of Newfoundland. *Canadian*  
574 *Journal of Earth Sciences* 45:1095–1109.
- 575 Fraley, C., and A. E. Raftery. 2017: MCLUST Version 3 for R: Normal Mixture Modeling  
576 and Model-Based Clustering\*. :57.
- 577 Gehling, J. G., and G. M. Narbonne. 2007: Spindle-shaped Ediacara fossils from the  
578 Mistaken Point assemblage, Avalon Zone, Newfoundland. *Canadian Journal of Earth*  
579 *Sciences* 44:367–387.
- 580 Ghisalberti, M., D. A. Gold, M. Laflamme, M. E. Clapham, G. M. Narbonne, R. E.  
581 Summons, D. T. Johnston, and D. K. Jacobs. 2014: Canopy Flow Analysis Reveals  
582 the Advantage of Size in the Oldest Communities of Multicellular Eukaryotes.  
583 *Current Biology* 24:305–309.
- 584 Hallworth, M. A., J. C. Phillips, H. E. Huppert, and R. S. J. Sparks. 1993: Entrainment in  
585 turbulent gravity currents. *Nature* 362:829–831.
- 586 Haughton, P., C. Davis, W. McCaffrey, and S. Barker. 2009: Hybrid sediment gravity flow  
587 deposits – Classification, origin and significance. *Marine and Petroleum Geology*  
588 26:1900–1918.
- 589 Hawco, J. B., C. G. Kenchington, R. S. Taylor, and D. McIlroy. 2020: A MULTIVARIATE  
590 STATISTICAL ANALYSIS OF THE EDIACARAN RANGEOMORPH TAXA  
591 BEOTHUKIS AND CULMOFRONS. *PALAIOS* 35:495–511.
- 592 Hofmann, H. J., S. J. O'Brien, and A. F. King. 2008: Ediacaran biota on Bonavista Peninsula,  
593 Newfoundland, Canada. *Journal of Paleontology* 82:1–36.
- 594 Ichaso, A. A., R. W. Dalrymple, and G. M. Narbonne. 2007: Paleoenvironmental and basin  
595 analysis of the late Neoproterozoic (Ediacaran) upper Conception and St. John's

- 596 groups, west Conception Bay, Newfoundland. *Canadian Journal of Earth Sciences*  
597 44:25–41.
- 598 Illian, J., P. A. Penttinen, D. H. Stoyan, and D. D. Stoyan. 2008: *Statistical Analysis and*  
599 *Modelling of Spatial Point Patterns*. Wiley, p.
- 600 Jones, M. L., and J. M. Dennison. 1970: Oriented fossils as paleocurrent indicators in  
601 Paleozoic lutites of southern Appalachians. *Journal of Sedimentary Research* 40:642–  
602 649.
- 603 Kenchington, C. G., and P. R. Wilby. 2017: Rangeomorph classification schemes and intra-  
604 specific variation: are all characters created equal? Geological Society, London,  
605 *Special Publications* 448:221–250.
- 606 Kenchington, C. G., S. J. Harris, P. B. Vixseboxse, C. Pickup, and P. R. Wilby. 2018: The  
607 Ediacaran fossils of Charnwood Forest: Shining new light on a major biological  
608 revolution. *Proceedings of the Geologists' Association* 129:264–277.
- 609 Kiipli, T., E. Kiipli, T. Kallaste, R. Hints, P. Somelar, and K. Kirsimäe. 2007: Altered  
610 volcanic ash as an indicator of marine environment, reflecting ph and sedimentation  
611 rate – example from the Ordovician Kinnekulle bed of Baltoscandia. *Clays and Clay*  
612 *Minerals* 55:177–188.
- 613 Koehl, M. A. R. 1977a: Effects of Sea Anemones on the Flow Forces They Encounter.  
614 *Journal of Experimental Biology* 69:87–105.
- 615 ———. 1977b: Mechanical Organization of Cantileverlike Sessile Organisms: Sea  
616 Anemones. *Journal of Experimental Biology* 69:127–142.
- 617 Laflamme, M., and G. M. Narbonne. 2008: Ediacaran fronds. *Palaeogeography,*  
618 *Palaeoclimatology, Palaeoecology* 258:162–179.

- 619 Laflamme, M., G. M. Narbonne, and M. M. Anderson. 2004: Morphometric analysis of the  
620 Ediacaran frond *Charniodiscus* from the Mistaken Point Formation, Newfoundland.  
621 *Journal of Paleontology* 78:827–837.
- 622 Laflamme, M., S. Xiao, and M. Kowalewski. 2009: Osmotrophy in modular Ediacara  
623 organisms. *Proceedings of the National Academy of Sciences* 106:14438–14443.
- 624 Laflamme, M., L. I. Flude, and G. M. Narbonne. 2012: Ecological tiering and the evolution  
625 of a stem: the oldest stemmed frond from the Ediacaran of Newfoundland, Canada.  
626 *Journal of Paleontology* 86:193–200.
- 627 Laflamme, M., J. G. Gehling, and M. L. Droser. 2018: Deconstructing an Ediacaran frond:  
628 three-dimensional preservation of *Arborea* from Ediacara, South Australia. *Journal of*  
629 *Paleontology* 92:323–335.
- 630 Landler, L., G. D. Ruxton, and E. P. Malkemper. 2019: The Hermans–Rasson test as a  
631 powerful alternative to the Rayleigh test for circular statistics in biology. *BMC*  
632 *Ecology* 19:30.
- 633 Liu, A. G., C. G. Kenchington, and E. G. Mitchell. 2015: Remarkable insights into the  
634 paleoecology of the Avalonian Ediacaran macrobiota. *Gondwana Research* 27:1355–  
635 1380.
- 636 Liu, A. G., D. McIlroy, J. B. Antcliffe, and M. D. Brasier. 2011: Effaced preservation in the  
637 Ediacara biota and its implications for the early macrofossil record. *Palaeontology*  
638 54:607–630.
- 639 Liu, X., and Y. Jiang. 2014: Direct numerical simulations of boundary condition effects on  
640 the propagation of density current in wall-bounded and open channels. *Environmental*  
641 *Fluid Mechanics* 14:387–407.
- 642 Luhar, M., and H. M. Nepf. 2011: Flow-induced reconfiguration of buoyant and flexible  
643 aquatic vegetation. *Limnology and Oceanography* 56:2003–2017.

- 644 Mason, S. J., and G. M. Narbonne. 2016: Two new Ediacaran small fronds from Mistaken  
645 Point, Newfoundland. *Journal of Paleontology* 90:183–194.
- 646 Matthews, J. J., A. G. Liu, C. Yang, D. McIlroy, B. Levell, and D. J. Condon. 2021: A  
647 Chronostratigraphic Framework for the Rise of the Ediacaran Macrobiota: New  
648 Constraints from Mistaken Point Ecological Reserve, Newfoundland. *GSA Bulletin*.
- 649 McIlroy, D., J. Hawco, C. McKean, R. Nicholls, G. Pasinetti, and R. Taylor. 2021:  
650 Palaeobiology of the reclining rangeomorph *Beothukis* from the Ediacaran Mistaken  
651 Point Formation of southeastern Newfoundland. *Geological Magazine*:1–15.
- 652 Ming-Chao, L., and D. Chang-Feng. 1996: Drag, morphology and mechanical properties of  
653 three species of octocorals. *Journal of Experimental Marine Biology and Ecology* 1–  
654 2:13–22.
- 655 Mitchell, E. G., and C. G. Kenchington. 2018: The utility of height for the Ediacaran  
656 organisms of Mistaken Point. *Nature Ecology & Evolution* 2:1218–1222.
- 657 Mitchell, E. G., and N. J. Butterfield. 2018: Spatial analyses of Ediacaran communities at  
658 Mistaken Point. *Paleobiology* 44:40–57.
- 659 Mitchell, E. G., and S. Harris. 2020: Mortality, Population and Community Dynamics of the  
660 Glass Sponge Dominated Community “The Forest of the Weird” From the Ridge  
661 Seamount, Johnston Atoll, Pacific Ocean. *Frontiers in Marine Science* 7.
- 662 Mitchell, E. G., C. G. Kenchington, S. Harris, and P. R. Wilby. 2018: Revealing  
663 rangeomorph species characters using spatial analyses. *Canadian Journal of Earth  
664 Sciences* 55:1262–1270.
- 665 Mitchell, E. G., C. G. Kenchington, A. G. Liu, J. J. Matthews, and N. J. Butterfield. 2015:  
666 Reconstructing the reproductive mode of an Ediacaran macro-organism. *Nature*  
667 524:343–346.

- 668 Mitchell, E. G., S. Harris, C. G. Kenchington, P. Vixseboxse, L. Roberts, C. Clark, A.  
669 Dennis, A. G. Liu, and P. R. Wilby. 2019: The importance of neutral over niche  
670 processes in structuring Ediacaran early animal communities. *Ecology Letters*  
671 22:2028–2038.
- 672 Mitchell, E. G., N. Bobkov, N. Bykova, A. Dhungana, A. Kolesnikov, I. R. P. Hogarth, A. G.  
673 Liu, T. M. R. Mustill, N. Sozonov, S. Xiao, and D. V. Grazhdankin. 2020: The  
674 influence of environmental setting on the community ecology of Ediacaran  
675 organisms. *Interface Focus* 10.
- 676 Narbonne, G. M. 2004: Modular Construction of Early Ediacaran Complex Life Forms.  
677 *Science* 305:1141–1144.
- 678 ———. 2005: THE EDIACARA BIOTA: Neoproterozoic Origin of Animals and Their  
679 Ecosystems. *Annual Review of Earth and Planetary Sciences* 33:421–442.
- 680 Narbonne, G. M., and J. G. Gehling. 2003: Life after snowball: The oldest complex  
681 Ediacaran fossils. *Geology* 31:27–30.
- 682 Noble, S. R., D. J. Condon, J. N. Carney, P. R. Wilby, T. C. Pharaoh, and T. D. Ford. 2015:  
683 U-Pb geochronology and global context of the Charnian Supergroup, UK: Constraints  
684 on the age of key Ediacaran fossil assemblages. *GSA Bulletin* 127:250–265.
- 685 Rao, J. S. 1976: Some Tests Based on Arc-Lengths for the Circle. *Sankhyā: The Indian*  
686 *Journal of Statistics, Series B (1960-2002)* 38:329–338.
- 687 Schnute, J. T., and K. Groot. 1992: Statistical analysis of animal orientation data. *Animal*  
688 *Behaviour* 43:15–33.
- 689 Seilacher, A. 1992: Vendobionta and Psammocorallia: lost constructions of Precambrian  
690 evolution. *Journal of the Geological Society* 149:607–613.
- 691 Shen, B., L. Dong, S. Xiao, and M. Kowalewski. 2008: The Avalon Explosion: Evolution of  
692 Ediacara Morphospace. *Science* 319:81–84.

- 693 Smith, P. L. 1980: Determining the in situ Orientation of Fossil Bilateral Symmetry Planes  
694 during Paleocurrent Analysis. *Journal of Paleontology* 54:1121–1123.
- 695 Sparks, R. S. J., and C. J. N. Wilson. 1983: Flow-head deposits in ash turbidites. *Geology*  
696 11:348–351.
- 697 Sperling, E. A., K. J. Peterson, and M. Laflamme. 2011: Rangeomorphs, Thectardis  
698 (Porifera?) and dissolved organic carbon in the Ediacaran oceans. *Geobiology* 9:24–  
699 33.
- 700 Talling, P. J., D. G. Masson, E. J. Sumner, and G. Malgesini. 2012: Subaqueous sediment  
701 density flows: Depositional processes and deposit types. *Sedimentology* 59:1937–  
702 2003.
- 703 Toots, H. 1965: Orientation and Distribution of Fossils as Environmental Indicators. :219–  
704 229.
- 705 Waggoner, B. 2003: The Ediacaran Biotas in Space and Time. *Integrative and Comparative*  
706 *Biology* 43:104–113.
- 707 Wegst, U. G. K., and M. F. Ashby. 2007: The structural efficiency of orthotropic stalks,  
708 stems and tubes. *Journal of Materials Science* 42:9005–9014.
- 709 Wiegand, T., and K. A. Moloney. 2013: *Handbook of Spatial Point-Pattern Analysis in*  
710 *Ecology*. CRC Press, p.
- 711 Wilby, P. R., C. G. Kenchington, and R. L. Wilby. 2015: Role of low intensity environmental  
712 disturbance in structuring the earliest (Ediacaran) macrobenthic tiered communities.  
713 *Palaeogeography, Palaeoclimatology, Palaeoecology* 434:14–27.
- 714 Wood, D. A., R. W. Dalrymple, G. M. Narbonne, J. G. Gehling, and M. E. Clapham. 2003:  
715 Paleoenvironmental analysis of the late Neoproterozoic Mistaken Point and Trepassey  
716 formations, southeastern Newfoundland. *Canadian Journal of Earth Sciences*  
717 40:1375–1391.

- 718 Wood, R., A. G. Liu, F. Bowyer, P. R. Wilby, F. S. Dunn, C. G. Kenchington, J. F. H.  
719 Cuthill, E. G. Mitchell, and A. Penny. 2019: Integrated records of environmental  
720 change and evolution challenge the Cambrian Explosion. *Nature Ecology &*  
721 *Evolution* 3:528–538.
- 722 Xiao, S., and M. Laflamme. 2009: On the eve of animal radiation: phylogeny, ecology and  
723 evolution of the Ediacara biota. *Trends in Ecology and Evolution* 24:31–40.
- 724

725 **Figure and Table Captions**

726 **Figure 1:** E surface taxa included in this study. A) *Charniodiscus procerus* and *Beothukis*

727 and B) Close up of *Beothukis* C) *Charniodiscus spinosus* D) *Thectardis*, E) *Fractofusus* and

728 *Plumeropriscum* and F) *Primocandelabrum*. Scale bar is 5cm.

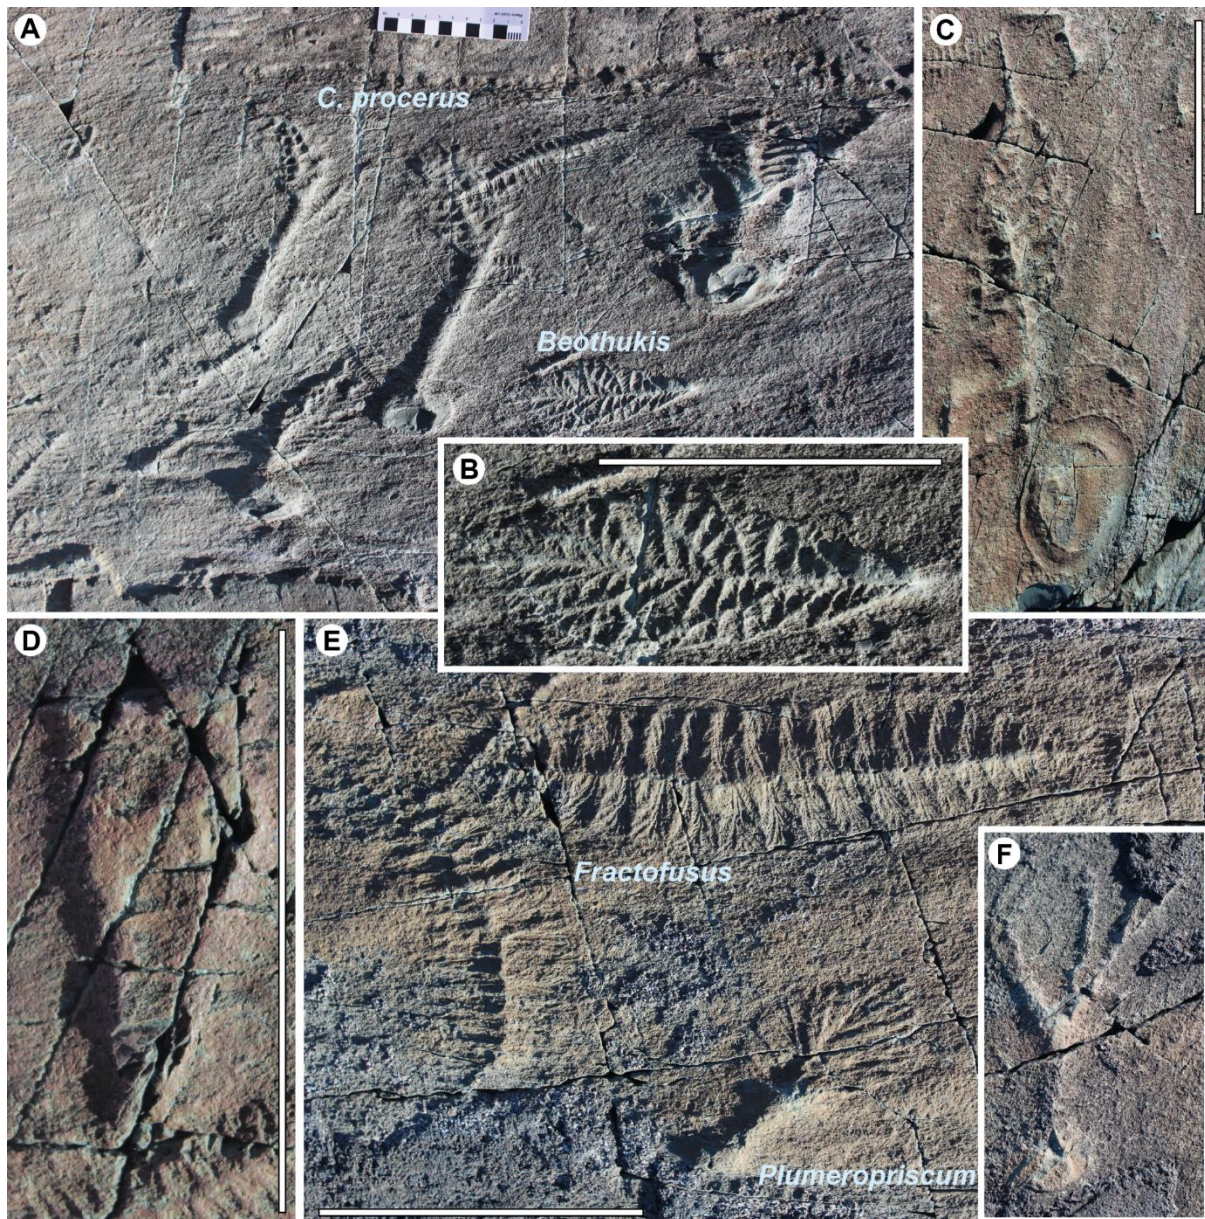

729



730 **Figure 2:** Geological Map after Liu (2016) and Matthews et al. (2021) showing the location  
731 of the E surface, Mistaken Point within Newfoundland, Canada, and the stratigraphy and age  
732 from Matthews et al. 2021.

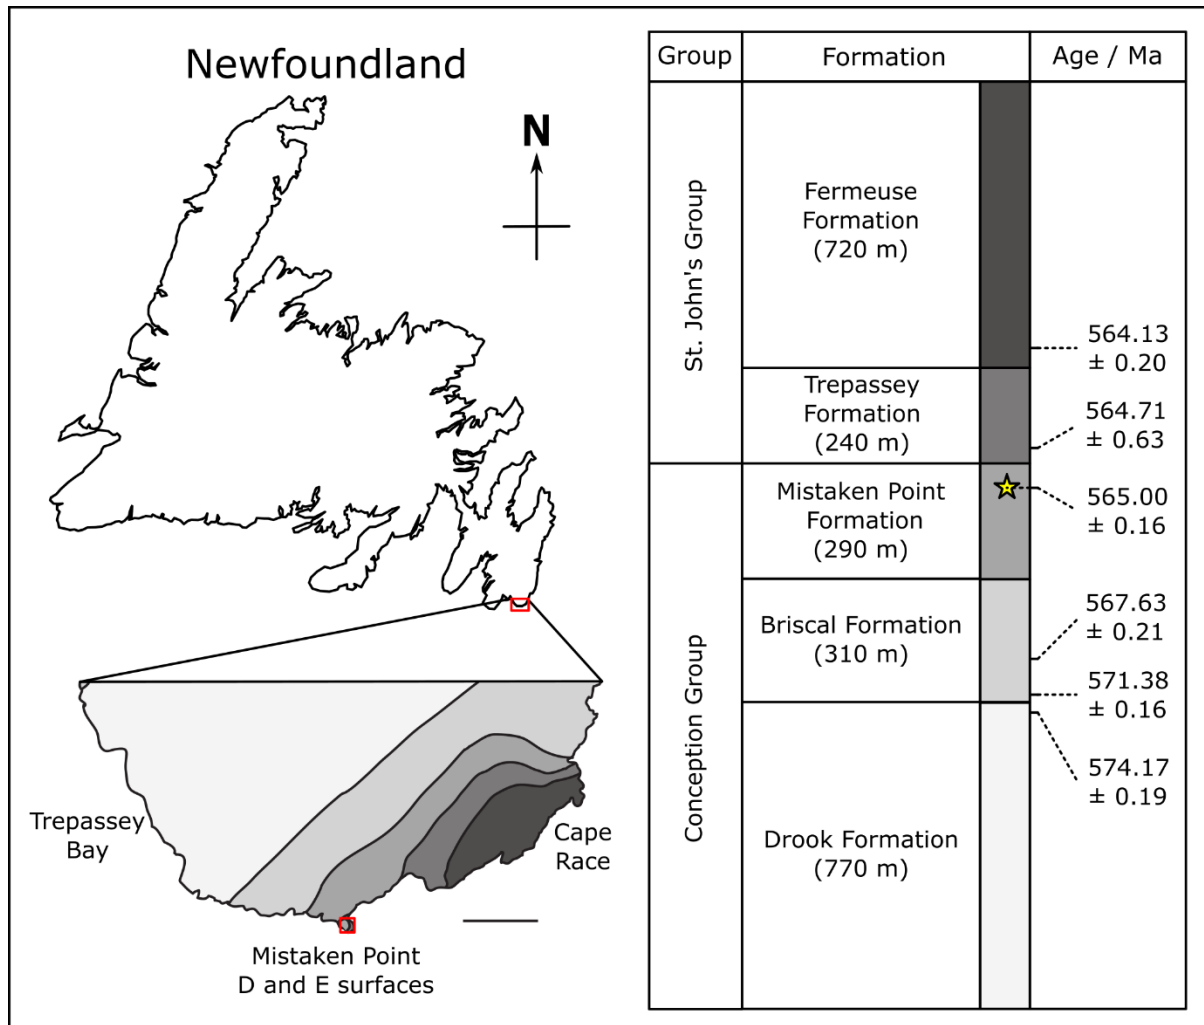

733

734

735 **Figure 3:** Specimen measurements. An example specimen (A) showing the retrodeformation  
736 of the disc B to C, and D) the measurements collected for each specimen. The position of the  
737 disc is denoted as  $(x_{disc}, y_{disc})$ ; the length of the frond as  $L_f$ ; the length of the stem as  $L_s$ ; the  
738 angle of the frond as  $\theta_f$ ; and the angle of the stem as  $\theta_s$ .

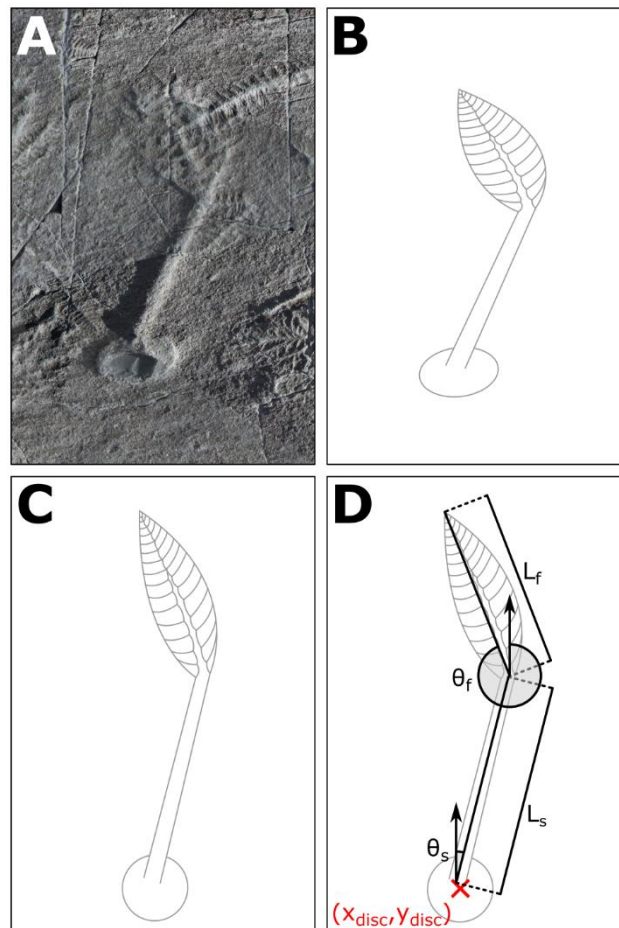

739

740 **Figure 4:** Rose diagrams of the population. Blue indicates frond orientations, Red, the stem  
741 orientations and yellow for *Thectardis*. Arrows indicate the mean(s) of the cohort orientation  
742 distributions, with starred arrows indicating where outliers have been removed.

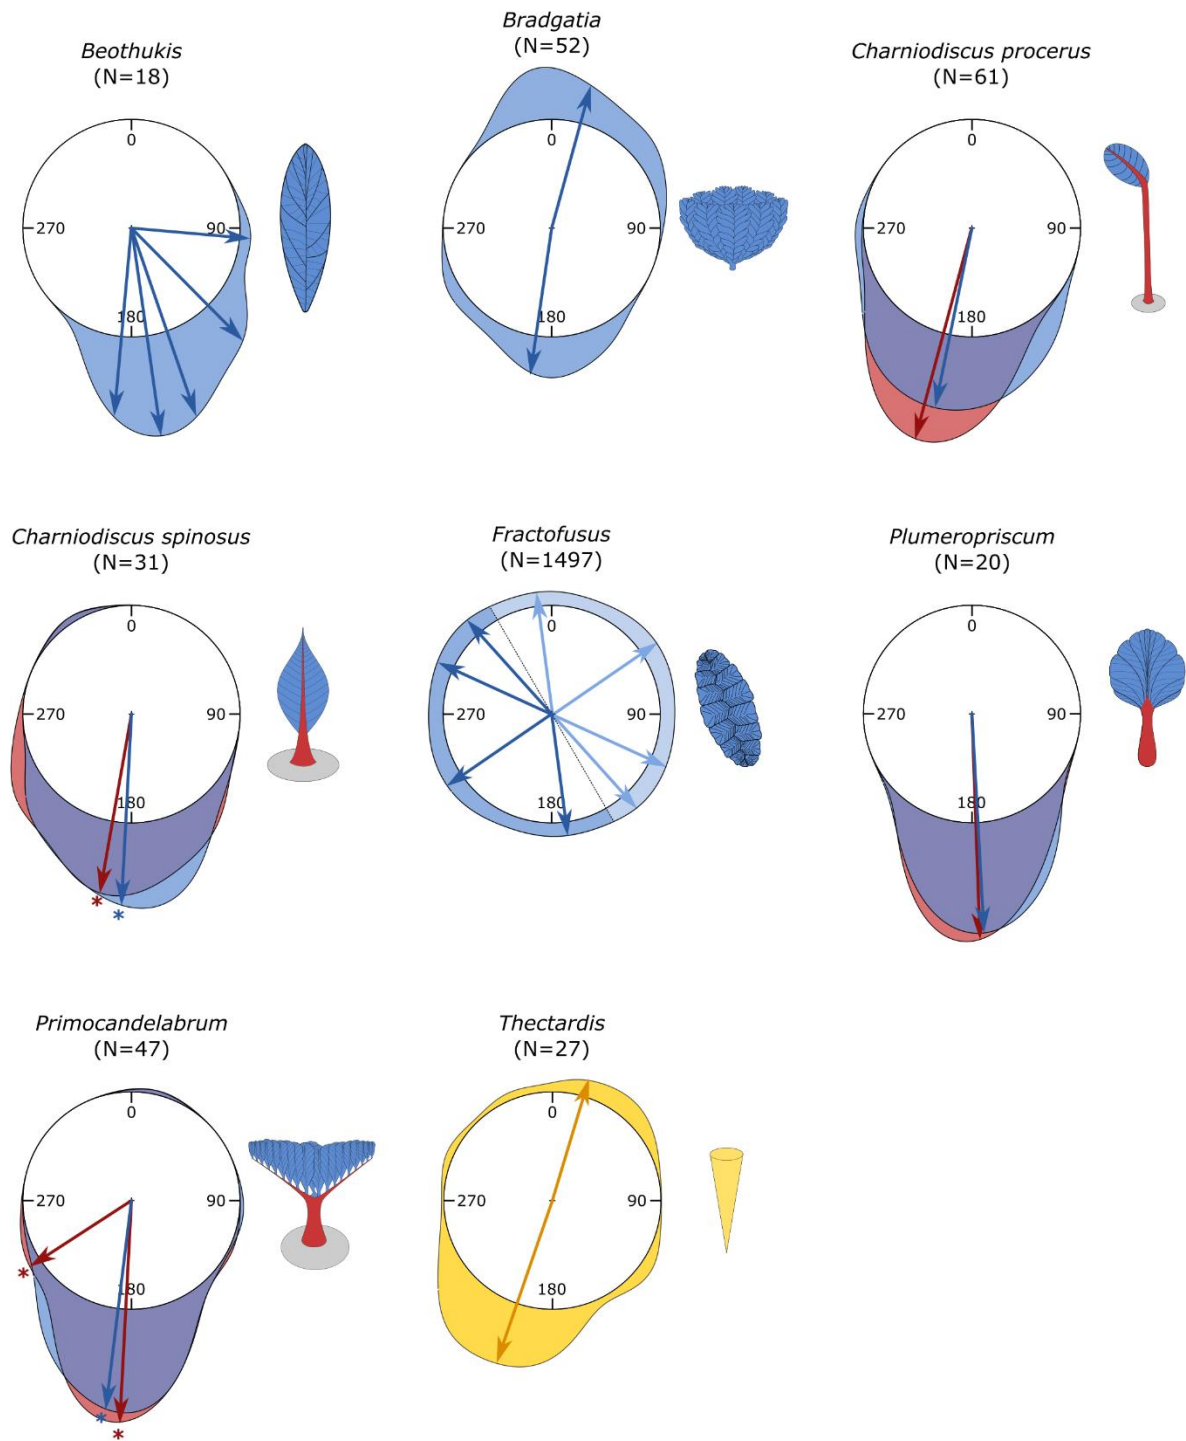

743

744 **Figure 5:** Random labelling analyses for the two cohorts of *Bradgatia*. A) Mapped *Bradgatia*  
745 on the E surface, showing the two directions in light and dark blue. The diameter of the  
746 circles represents the height of the specimens. Light grey area is the retrodeformed outline of  
747 the E surface.

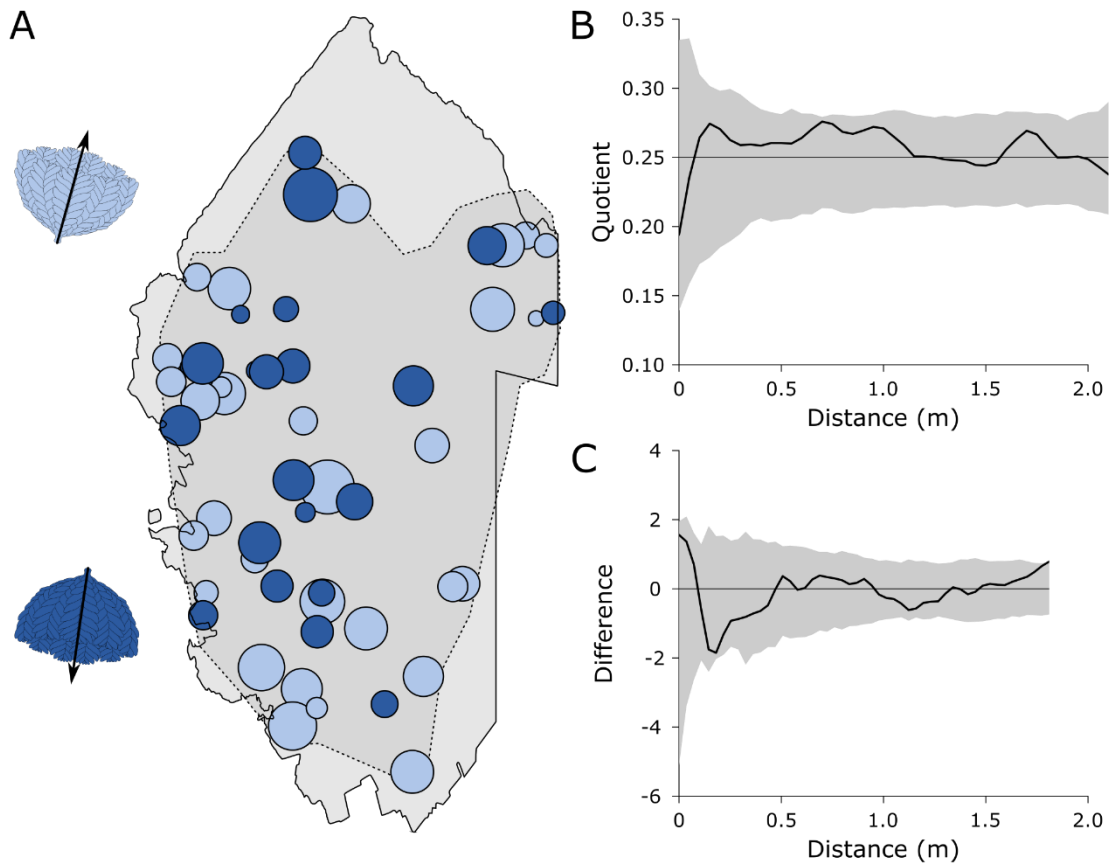

748

749 **Figure 6.** Schematic illustrating the sequence of events that yield the preserved orientation  
750 distributions. A) E surface community in life, with all fronds bar *Fractofusus* having an  
751 upright mode of life. B) The turbid head of the gravity flow fells organisms with a high centre  
752 of gravity, including *Thectardis* and *Bradgatia*, producing a bimodal orientation distribution  
753 pattern. C) The laminar tail of the gravity flow fells all other upright fronds on the surface. D)  
754 Ash settles out of the flow, and smothers the community with the preserved distribution of  
755 orientations. Yellow = *Thectardis*; pink = *Bradgatia*; dark blue = *Fractofusus*; grey =  
756 *Charniodiscus procerus* and *Charniodiscus spinosus*; blue = upright fronds felled with a  
757 unimodal orientation (*Beothukis*, *Plumeropriscum* and *Primocandelabrum*).

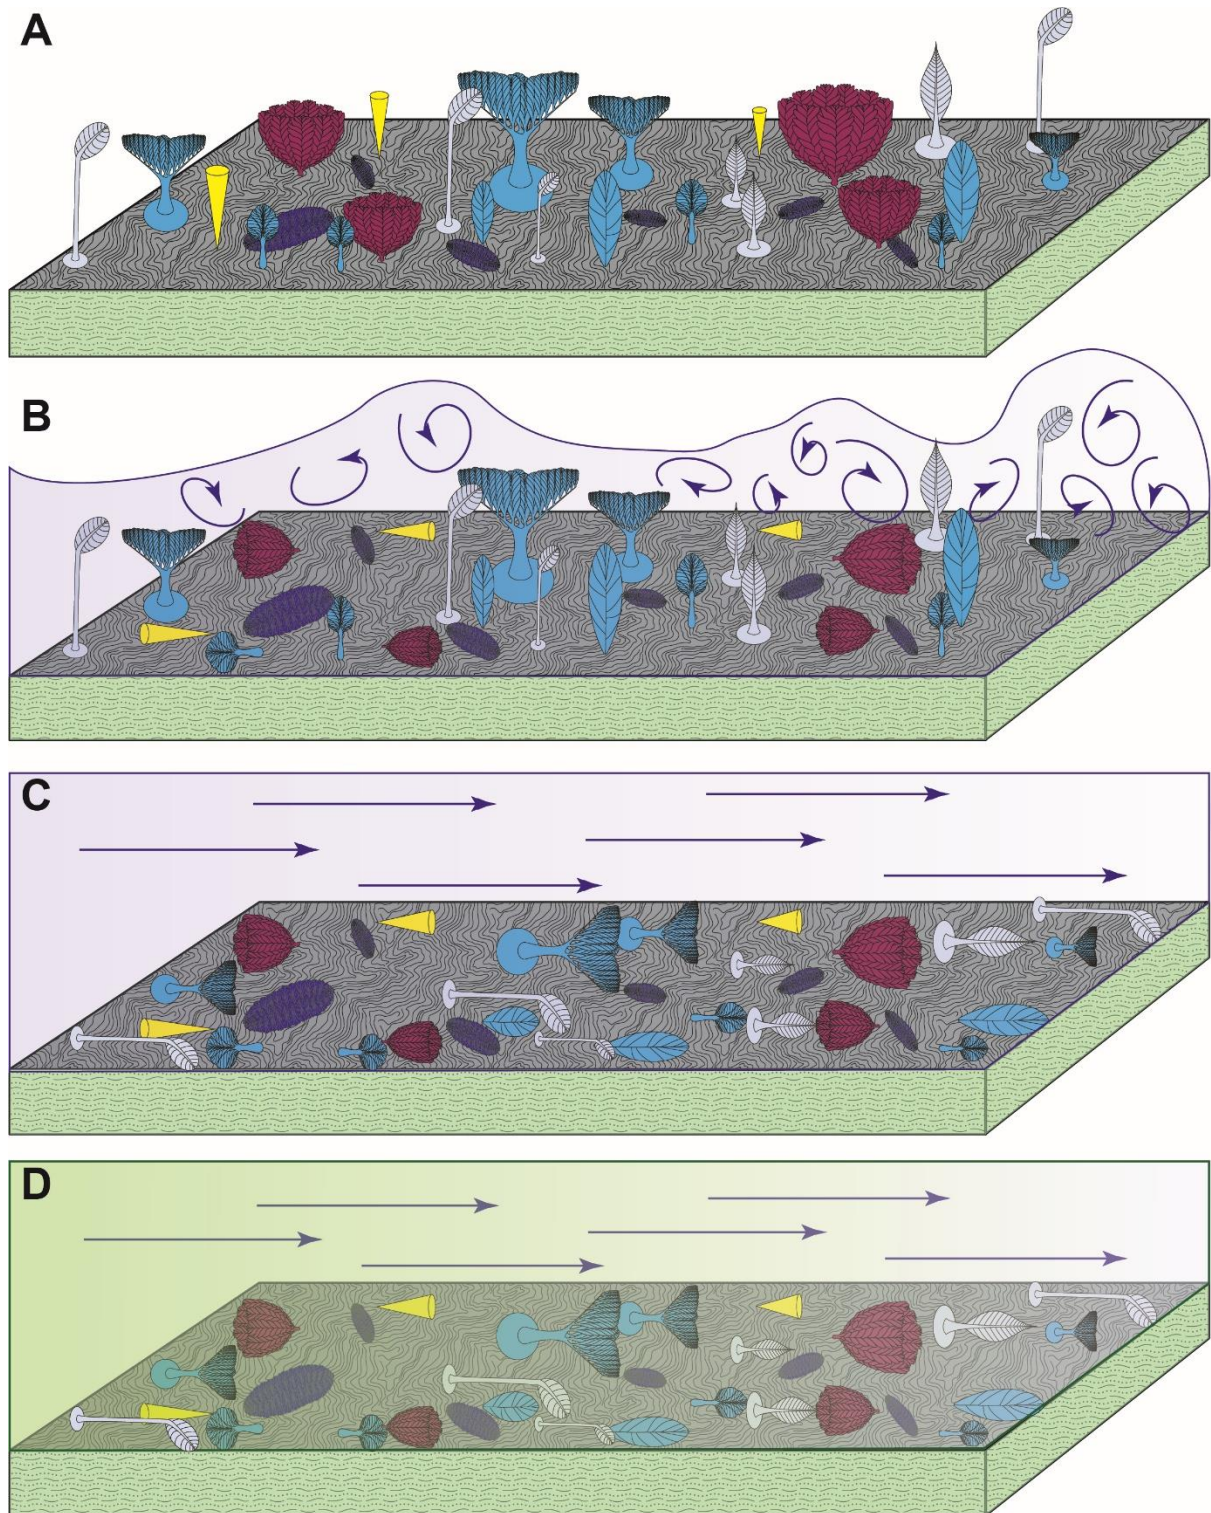

759 **Table 1.** Results of uniformity tests, with 5% significance levels used to indicate rejection of  
 760 the null models i.e. non-random orientations for the Rao's spacing and Hermans-Rasson tests  
 761 and von Mises distribution (normally distributed orientation data) for the Watson's test.

762

| <b>Taxa</b>             | <b>Measurement</b> | <b>Rao's Test<br/><i>p</i>-value</b> | <b>Hermans-Rasson<br/>test <i>p</i>-value</b> | <b>Watson's Test<br/><i>p</i>-value</b> |
|-------------------------|--------------------|--------------------------------------|-----------------------------------------------|-----------------------------------------|
| <i>Beothukis</i>        | Fronds             | < 0.001                              | 0.0001                                        | > 0.10                                  |
| <i>Bradgatia</i>        | Fronds             | < 0.001                              | 0.0001                                        | > 0.10                                  |
|                         |                    |                                      |                                               | < 0.05                                  |
| <i>C. procerus</i>      | Stems              | < 0.001                              | 0.0001                                        | > 0.10                                  |
|                         | Fronds             | < 0.001                              | 0.0001                                        | > 0.10                                  |
| <i>C. spinosus</i>      | Stems              | < 0.001                              | 0.0001                                        | > 0.10                                  |
|                         | Fronds             | < 0.001                              | 0.0001                                        | > 0.10                                  |
| <i>Fractofusus</i>      | Length             | < 0.001                              | 0.0010                                        | > 0.10                                  |
| <i>Plumeropriscum</i>   | Stems              | < 0.001                              | 0.0001                                        | > 0.10                                  |
|                         | Fronds             | < 0.001                              | 0.0001                                        | > 0.10                                  |
| <i>Primocandelabrum</i> | Stems              | < 0.001                              | 0.0001                                        | < 0.01                                  |
|                         | Fronds             | < 0.001                              | 0.0001                                        | < 0.05                                  |
| <i>Thectardis</i>       | Cones              | < 0.010                              | 0.0001                                        | > 0.10                                  |
|                         |                    |                                      |                                               | > 0.10                                  |

763

764

765 **Table 2.** Cohort analyses for each morphogroup orientation distribution.  $\sigma$  indicates the  
 766 standard deviation of each cohort with respect to the provided mean orientation. Where all  
 767 cohorts within a population have equal standard deviation (such as *Beothukis*) a single  $\sigma$  is  
 768 given, and where each  $\sigma$  varies according to the cohort (unequal variance) then a value is

769 given for each cohort. Note that the *Fractofusus* data is taken from Clapham et al. 2003. Note  
 770 for *C. spinosus* and *Primocandelabrum* the cohorts of one represents outliers, which were not  
 771 well resolved by cohort-analyses (Supp. Fig. 3).

772

| <b>Taxa</b>             | <b>Measured</b> | <b>N</b> | <b>Mean Orientation (°)</b> | <b><math>\sigma</math></b> | <b>Proportion</b> |
|-------------------------|-----------------|----------|-----------------------------|----------------------------|-------------------|
| <i>Beothukis</i>        | Fronds          | 1        | 95                          | 2.45                       | 5.56%             |
|                         |                 | 4        | 135                         |                            | 22.22%            |
|                         |                 | 5        | 161                         |                            | 27.78%            |
|                         |                 | 3        | 172                         |                            | 16.67%            |
|                         |                 | 5        | 185                         |                            | 27.78%            |
| <i>Bradgatia</i>        | Fronds          | 30       | 15                          | 26.79                      | 57.69%            |
|                         |                 | 22       | 188                         |                            | 42.31%            |
| <i>C. procerus</i>      | Stems           | 61       | 195                         | 18.89                      | 100.00%           |
|                         | Fronds          | 61       | 192                         | 30.23                      | 100.00%           |
| <i>C. spinosus</i>      | Stems           | 30       | 190                         | 30.87                      | 96.77%            |
|                         |                 | 1        | 326                         | NA                         | 3.23%             |
|                         | Fronds          | 30       | 183                         | 24.83                      | 96.77%            |
|                         |                 | 1        | 328                         | NA                         | 3.23%             |
| <i>Fractofusus</i>      | Fronds          | 312      | 172                         | 13.19                      | 20.84%            |
|                         |                 | 678      | 236                         | 26.02                      | 45.29%            |
|                         |                 | 306      | 295                         | 13.44                      | 20.44%            |
|                         |                 | 201      | 318                         | 5.89                       | 13.43%            |
| <i>Plumeropriscum</i>   | Stems           | 20       | 178                         | 16.73                      | 100.00%           |
|                         | Fronds          | 20       | 177                         | 17.26                      | 100.00%           |
| <i>Primocandelabrum</i> | Stems           | 42       | 183                         | 13.74                      | 89.36%            |



|                   |        |    |     |       |        |
|-------------------|--------|----|-----|-------|--------|
|                   |        | 3  | 237 | 13.74 | 6.38%  |
|                   |        | 1  | 11  | NA    | 2.13%  |
|                   |        | 1  | 119 | NA    | 2.13%  |
|                   | Fronds | 45 | 187 | 19.05 | 95.74% |
|                   |        | 1  | 14  | NA    | 2.13%  |
|                   |        | 1  | 98  | NA    | 2.13%  |
| <i>Thectardis</i> | Cones  | 7  | 17  | 33.00 | 25.93% |
|                   |        | 20 | 199 |       | 74.07% |
